# Supplementary material
Source: publisher site journal article supplement (https://www.dovepress.com/article/390349)

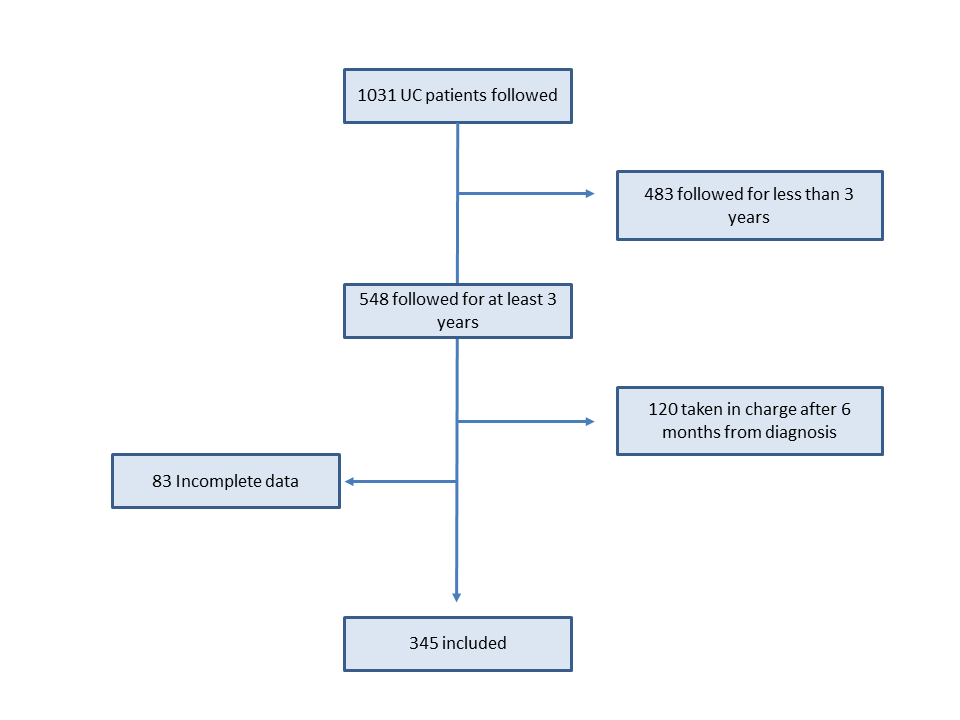


Supplementary Figure 1: patients' inclusion and exclusion criteria with relative numbers

Supplement: Supplementary file 1 [file get_supplementary_file.php]
